# Supplementary material
Source: PubMed Central journal article supplement (PMC11500759)
Supplement: NIHMS2027652-supplement-si.pdf [file NIHMS2027652-supplement-si.pdf]

**A Metabolomics Study at the Postharvest Conditions of Cold Storage  
and Fungicide (Imazalil Sulfate) Treatment in Navel Oranges and  
Clementine Mandarins.**

**Supporting Information**

Keeton H. Montgomery<sup>1</sup>, Gurreet Brar<sup>2</sup>, Viswanathan V. Krishnan<sup>1, 3</sup>

<sup>1</sup>Department of Chemistry & Biochemistry, <sup>2</sup>Department of Plant Science  
California State University, Fresno CA 93740;

<sup>3</sup>Department of Pathology and Laboratory Medicine, School of Medicine,  
University of California, Davis CA 95616

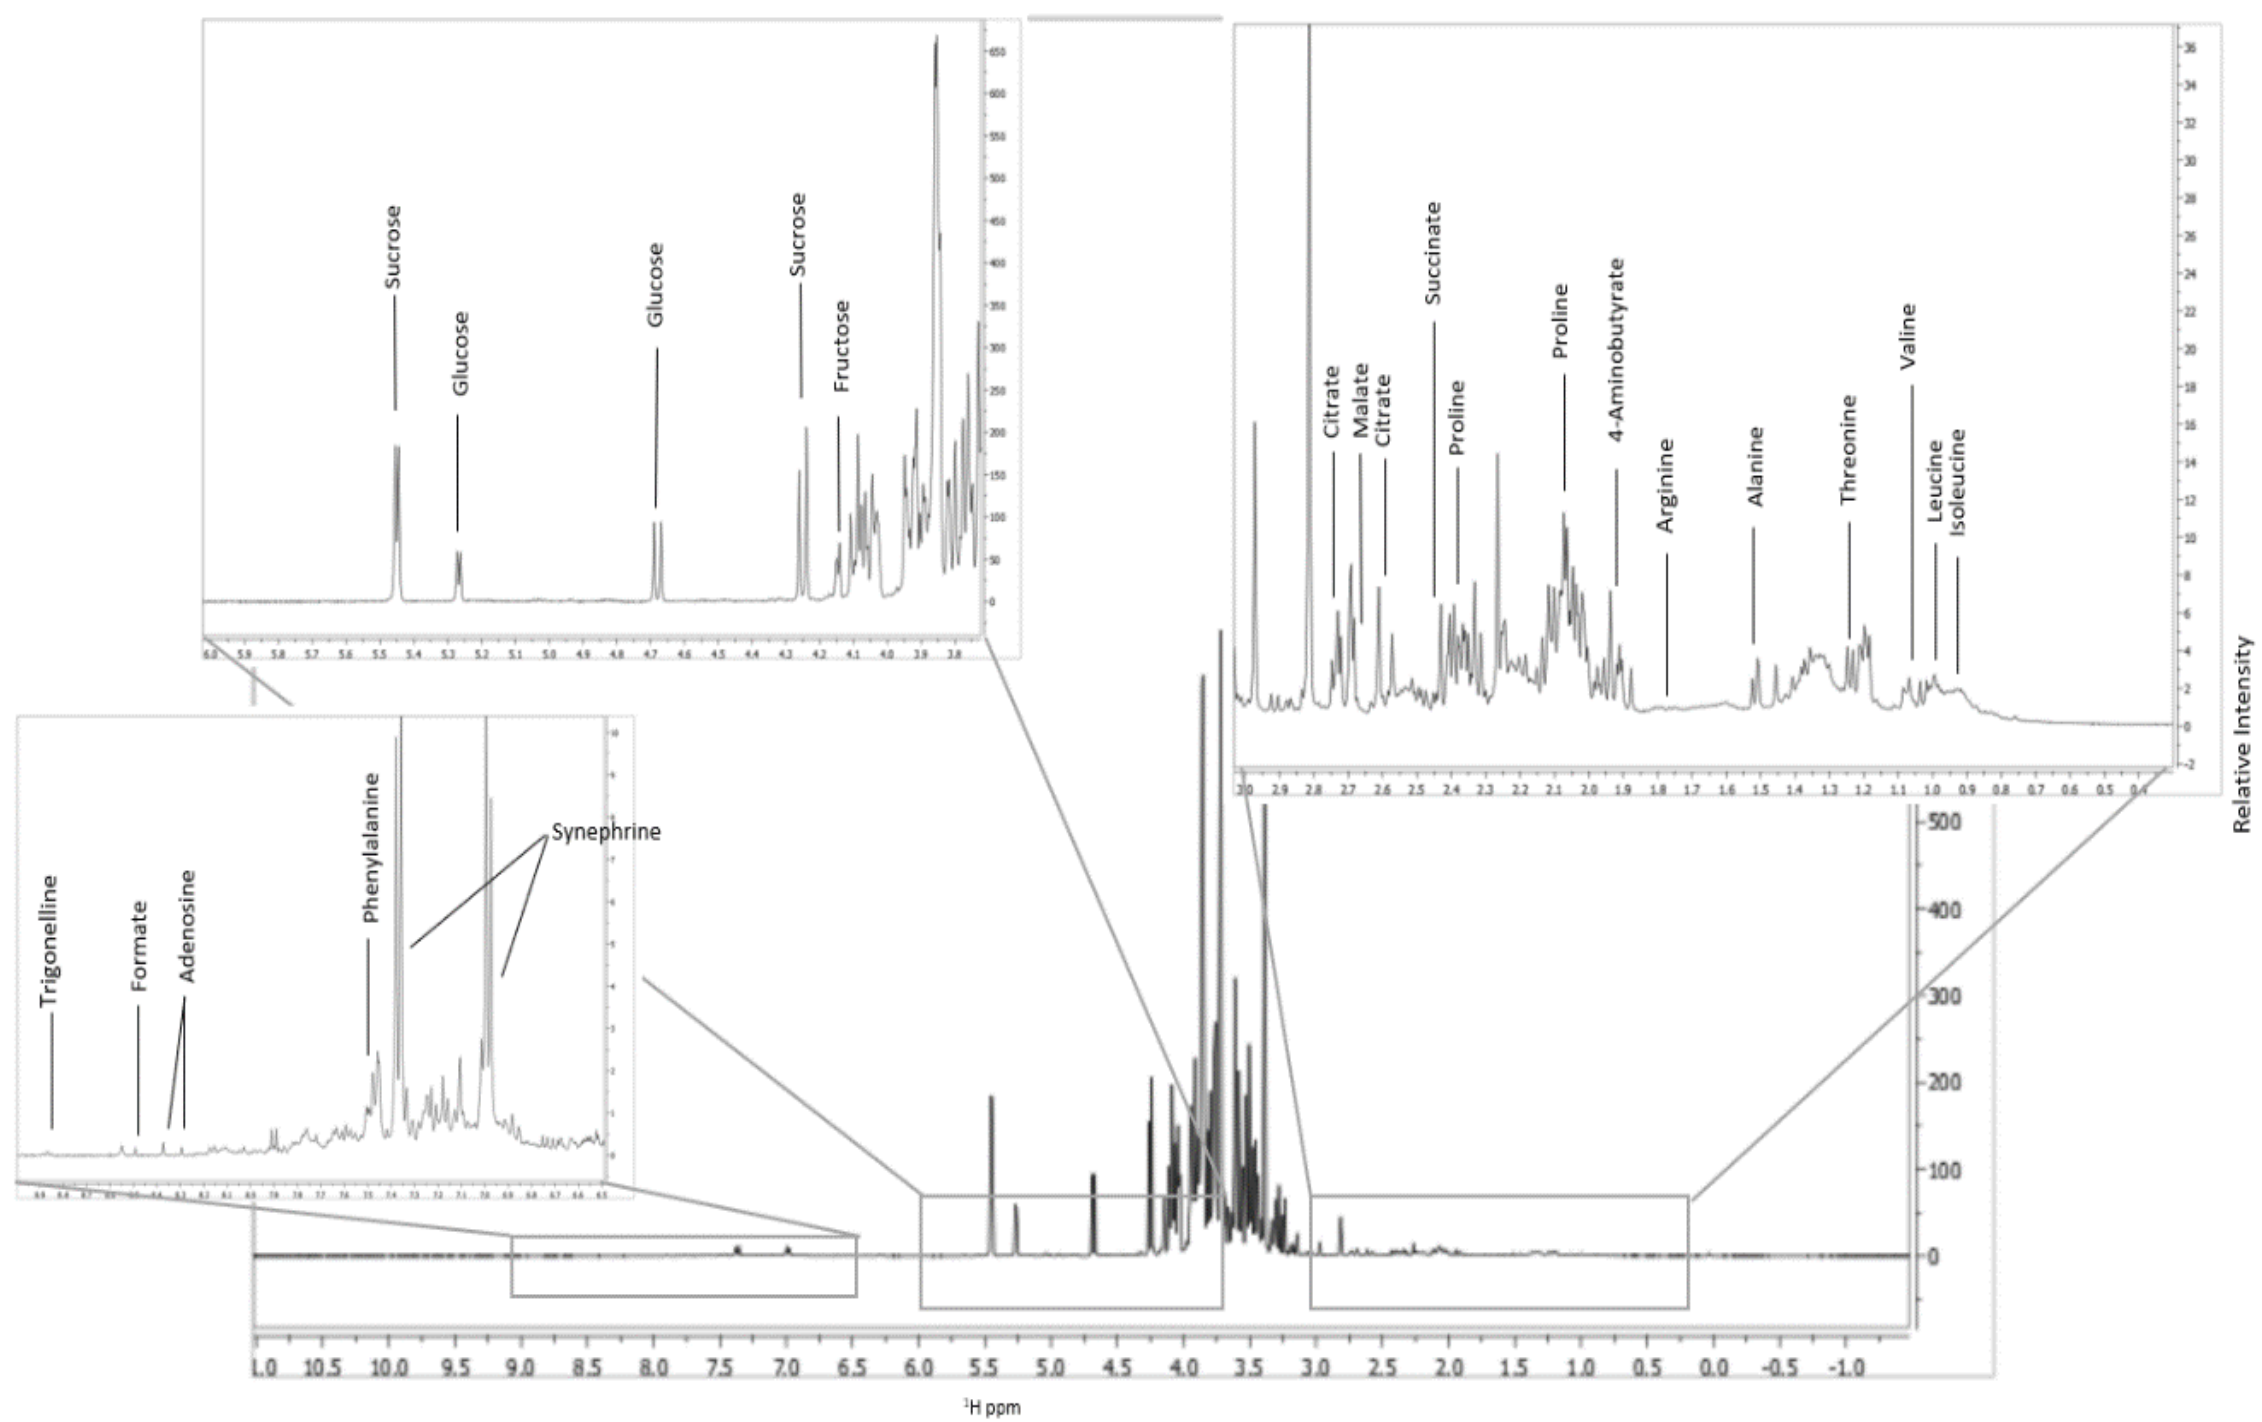

Figure S1

### Ctrl

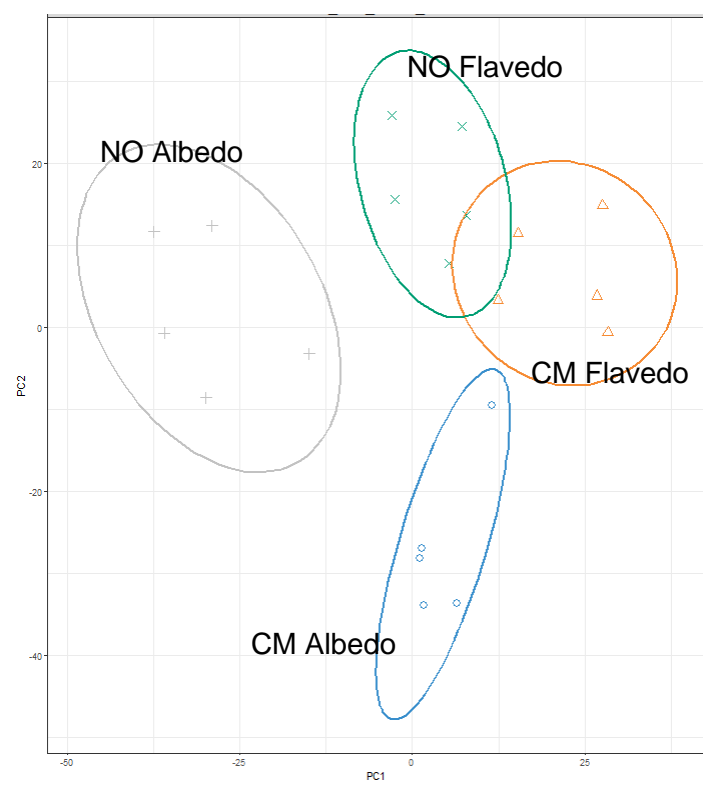

### Cold Storage

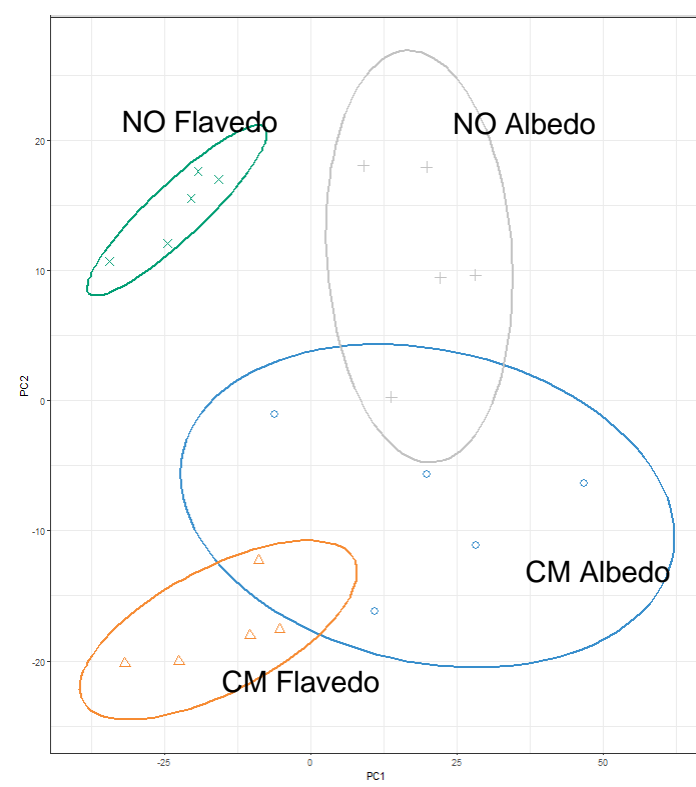

### Cold Storage + IMZ

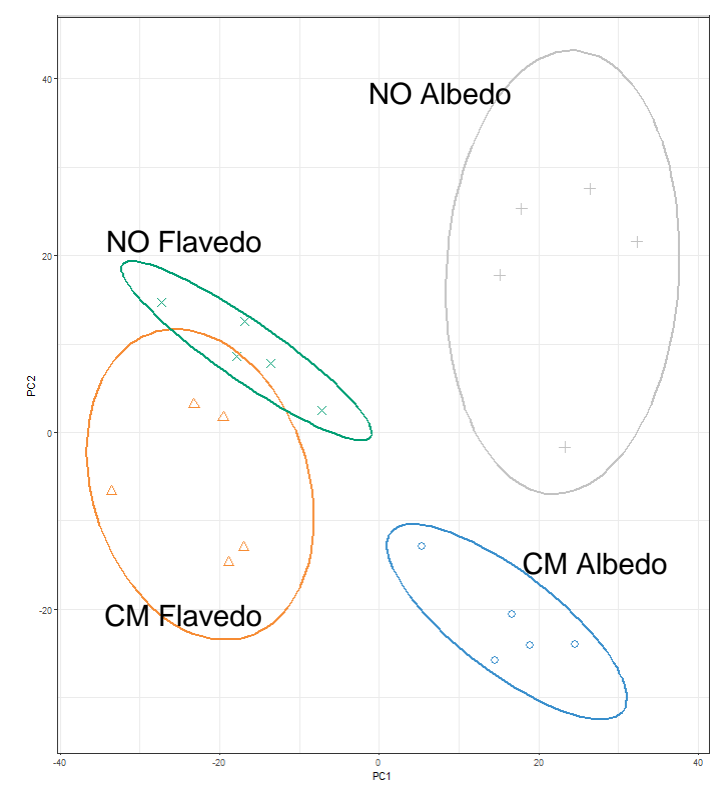

**Table S1. Average Metabolite Concentration in Albedo Tissues**

| Metabolites          | Clementine   |               |                    | Navel         |               |                    |
|----------------------|--------------|---------------|--------------------|---------------|---------------|--------------------|
|                      | Control      | Cold Storage  | Cold Storage + IMZ | Control       | Cold Storage  | Cold Storage + IMZ |
| <b>Sugars</b>        |              |               |                    |               |               |                    |
| Fructose             | 36.96 ± 5.50 | 28.61 ± 11.36 | 32.92 ± 3.10       | 57.59 ± 14.51 | 56.83 ± 6.97  | 57.26 ± 10.65      |
| Glucose              | 39.27 ± 3.60 | 30.78 ± 11.28 | 35.25 ± 2.87       | 71.72 ± 7.92  | 79.52 ± 18.14 | 78.01 ± 14.79      |
| Sucrose              | 33.49 ± 6.92 | 20.83 ± 6.63  | 23.46 ± 2.45       | 18.32 ± 8.65  | 12.27 ± 0.58  | 11.11 ± 1.35       |
| myo-Inositol         | 8.98 ± 0.87  | 7.51 ± 2.63   | 10.29 ± 0.78       | 6.45 ± 0.70   | 7.07 ± 0.33   | 6.74 ± 1.73        |
| <b>Amino Acids</b>   |              |               |                    |               |               |                    |
| Alanine              | 0.36 ± 0.09  | 0.26 ± 0.09   | 0.41 ± 0.08        | 0.28 ± 0.05   | 0.23 ± 0.01   | 0.22 ± 0.03        |
| Arginine             | 2.19 ± 0.16  | 1.31 ± 0.08   | 1.32 ± 0.11        | 2.98 ± 0.11   | 2.45 ± 0.08   | 2.28 ± 0.05        |
| Asparagine           | ND           | ND            | ND                 | ND            | ND            | ND                 |
| Aspartate            | ND           | ND            | ND                 | ND            | ND            | ND                 |
| Isoleucine           | 0.16 ± 0.04  | 0.09 ± 0.03   | 0.09 ± 0.02        | 0.06 ± 0.02   | 0.09 ± 0.03   | 0.10 ± 0.03        |
| Leucine              | 0.12 ± 0.05  | 0.11 ± 0.04   | 0.15 ± 0.02        | 0.16 ± 0.03   | 0.10 ± 0.02   | 0.09 ± 0.01        |
| Phenylalanine        | 0.44 ± 0.03  | 0.29 ± 0.11   | 0.40 ± 0.13        | 0.57 ± 0.07   | 0.60 ± 0.14   | 0.49 ± 0.13        |
| Proline              | 3.97 ± 0.91  | 3.61 ± 1.03   | 3.48 ± 0.85        | 3.91 ± 2.07   | 2.97 ± 0.29   | 3.26 ± 0.69        |
| Threonine            | 0.47 ± 0.07  | 0.35 ± 0.17   | 0.41 ± 0.08        | 0.32 ± 0.07   | 0.34 ± 0.04   | 0.30 ± 0.05        |
| Valine               | 0.21 ± 0.06  | 0.13 ± 0.05   | 0.24 ± 0.10        | 0.23 ± 0.04   | 0.26 ± 0.06   | 0.28 ± 0.02        |
| <b>Organic Acids</b> |              |               |                    |               |               |                    |
| 2-Phosphoglycerate   | ND           | ND            | ND                 | ND            | ND            | ND                 |
| 4-Aminobutyrate      | 0.71 ± 0.14  | 0.74 ± 0.12   | 0.75 ± 0.15        | 0.82 ± 0.48   | 0.74 ± 0.11   | 0.81 ± 0.20        |
| Citrate              | 0.78 ± 0.45  | 0.79 ± 0.53   | 0.50 ± 0.26        | 0.59 ± 0.21   | 0.33 ± 0.17   | 0.45 ± 0.32        |
| Formate              | 0.01 ± 0.00  | 0.01 ± 0.00   | 0.01 ± 0.00        | 0.02 ± 0.00   | 0.02 ± 0.00   | 0.02 ± 0.00        |
| Malate               | 1.36 ± 0.52  | 1.33 ± 0.32   | 1.18 ± 0.21        | 1.17 ± 0.65   | 0.49 ± 0.21   | 0.92 ± 0.52        |
| Malonate             | 1.01 ± 0.24  | 0.84 ± 0.14   | 0.95 ± 0.24        | 0.40 ± 0.20   | 0.50 ± 0.17   | 0.63 ± 0.25        |
| Succinate            | 0.15 ± 0.02  | 0.11 ± 0.03   | 0.12 ± 0.04        | 0.10 ± 0.01   | 0.07 ± 0.01   | 0.09 ± 0.03        |
| <b>Others</b>        |              |               |                    |               |               |                    |
| Adenosine            | 0.03 ± 0.01  | 0.03 ± 0.01   | 0.04 ± 0.00        | 0.03 ± 0.01   | 0.03 ± 0.00   | 0.03 ± 0.00        |
| Choline              | 1.31 ± 0.25  | 1.16 ± 0.38   | 1.38 ± 0.24        | 0.48 ± 0.27   | 0.71 ± 0.09   | 0.74 ± 0.19        |
| Proline betaine      | 0.63 ± 0.05  | 0.62 ± 0.08   | 0.65 ± 0.10        | 0.35 ± 0.08   | 0.44 ± 0.06   | 0.43 ± 0.10        |
| Synephrine           | 2.48 ± 0.07  | 1.73 ± 0.53   | 2.31 ± 0.37        | 1.18 ± 0.14   | 1.06 ± 0.12   | 0.91 ± 0.14        |
| Trigonelline         | 0.02 ± 0.01  | 0.02 ± 0.00   | 0.02 ± 0.01        | 0.00 ± 0.00   | 0.00 ± 0.00   | 0.00 ± 0.00        |

*Expressed in mM with ± Standard Deviation, ND: Not Detected*

**Table S2. Average Metabolite Concentration in Flavedo Tissue**

| Metabolites          | Clementine   |              |                    | Navel         |              |                    |
|----------------------|--------------|--------------|--------------------|---------------|--------------|--------------------|
|                      | Control      | Cold Storage | Cold Storage + IMZ | Control       | Cold Storage | Cold Storage + IMZ |
| <b>Sugars</b>        |              |              |                    |               |              |                    |
| Fructose             | 57.87 ± 8.35 | 62.97 ± 6.30 | 64.10 ± 5.76       | 60.96 ± 10.08 | 65.56 ± 4.95 | 70.62 ± 10.19      |
| Glucose              | 54.78 ± 8.07 | 64.17 ± 5.18 | 61.79 ± 5.39       | 63.52 ± 10.91 | 67.88 ± 9.04 | 72.77 ± 11.93      |
| Sucrose              | 29.78 ± 4.55 | 21.49 ± 4.51 | 22.61 ± 6.12       | 24.34 ± 11.28 | 17.77 ± 2.54 | 15.64 ± 3.23       |
| myo-Inositol         | 6.89 ± 1.39  | 7.73 ± 2.21  | 8.38 ± 0.76        | 6.09 ± 1.18   | 6.02 ± 1.16  | 6.19 ± 0.55        |
| <b>Amino Acids</b>   |              |              |                    |               |              |                    |
| Alanine              | 0.36 ± 0.06  | 0.31 ± 0.07  | 0.37 ± 0.03        | 0.67 ± 0.17   | 0.49 ± 0.11  | 0.48 ± 0.05        |
| Arginine             | 3.93 ± 0.18  | 4.07 ± 0.34  | 5.44 ± 0.20        | 5.85 ± 0.32   | 6.34 ± 0.39  | 6.54 ± 0.35        |
| Asparagine           | 0.91 ± 0.46  | 0.67 ± 0.44  | 0.48 ± 0.26        | 5.84 ± 6.59   | 4.72 ± 5.39  | 8.44 ± 6.85        |
| Aspartate            | ND           | ND           | ND                 | ND            | ND           | ND                 |
| Isoleucine           | 0.21 ± 0.09  | 0.26 ± 0.12  | 0.25 ± 0.04        | 0.20 ± 0.06   | 0.30 ± 0.08  | 0.28 ± 0.08        |
| Leucine              | 0.24 ± 0.05  | 0.22 ± 0.05  | 0.27 ± 0.05        | 0.28 ± 0.04   | 0.18 ± 0.03  | 0.20 ± 0.06        |
| Phenylalanine        | 0.45 ± 0.05  | 0.43 ± 0.04  | 0.40 ± 0.06        | 0.46 ± 0.07   | 0.48 ± 0.06  | 0.44 ± 0.05        |
| Proline              | 6.04 ± 1.48  | 4.58 ± 0.72  | 4.03 ± 1.50        | 6.19 ± 1.37   | 5.81 ± 1.28  | 7.34 ± 2.01        |
| Threonine            | 0.76 ± 0.13  | 0.79 ± 0.32  | 0.75 ± 0.19        | 0.86 ± 0.26   | 0.87 ± 0.13  | 0.87 ± 0.12        |
| Valine               | 0.32 ± 0.06  | 0.37 ± 0.14  | 0.40 ± 0.09        | 0.51 ± 0.14   | 0.60 ± 0.04  | 0.60 ± 0.13        |
| <b>Organic Acids</b> |              |              |                    |               |              |                    |
| 2-Phosphoglycerate   | ND           | ND           | ND                 | ND            | ND           | ND                 |
| 4-Aminobutyrate      | 0.78 ± 0.23  | 0.81 ± 0.08  | 0.73 ± 0.24        | 1.16 ± 0.23   | 1.23 ± 0.34  | 1.30 ± 0.41        |
| Citrate              | 0.58 ± 0.35  | 0.34 ± 0.07  | 0.29 ± 0.21        | 0.31 ± 0.10   | 0.22 ± 0.06  | 0.31 ± 0.13        |
| Formate              | 0.02 ± 0.00  | 0.02 ± 0.00  | 0.03 ± 0.01        | 0.03 ± 0.00   | 0.03 ± 0.01  | 0.04 ± 0.01        |
| Malate               | 0.71 ± 0.20  | 0.85 ± 0.28  | 0.90 ± 0.64        | 2.00 ± 0.52   | 1.20 ± 0.55  | 2.16 ± 1.19        |
| Malonate             | 0.82 ± 0.18  | 0.75 ± 0.15  | 0.70 ± 0.24        | 0.23 ± 0.07   | 0.28 ± 0.13  | 0.33 ± 0.06        |
| Succinate            | 0.09 ± 0.03  | 0.10 ± 0.01  | 0.08 ± 0.05        | 0.10 ± 0.04   | 0.11 ± 0.06  | 0.19 ± 0.07        |
| <b>Others</b>        |              |              |                    |               |              |                    |
| Adenosine            | 0.04 ± 0.01  | 0.04 ± 0.01  | 0.05 ± 0.00        | 0.06 ± 0.01   | 0.05 ± 0.01  | 0.05 ± 0.00        |
| Choline              | 0.77 ± 0.34  | 0.88 ± 0.32  | 0.81 ± 0.17        | 0.47 ± 0.09   | 0.58 ± 0.11  | 0.70 ± 0.21        |
| Proline betaine      | 1.08 ± 0.13  | 1.13 ± 0.26  | 0.88 ± 0.38        | 0.62 ± 0.25   | 0.67 ± 0.21  | 0.95 ± 0.38        |
| Synephrine           | 4.10 ± 0.65  | 3.96 ± 0.93  | 3.66 ± 0.26        | 1.29 ± 0.05   | 1.43 ± 0.39  | 1.34 ± 0.27        |
| Trigonelline         | 0.02 ± 0.00  | 0.02 ± 0.01  | 0.03 ± 0.02        | 0.00 ± 0.00   | 0.00 ± 0.00  | 0.00 ± 0.00        |

*Expressed in mM with ± Standard Deviation, ND: Not Detected*

**Table S3. Average Metabolite Concentration in Juice**

| Metabolites               | Clementine     |                |                    | Navel          |                |                    |
|---------------------------|----------------|----------------|--------------------|----------------|----------------|--------------------|
|                           | Control        | Cold Storage   | Cold Storage + IMZ | Control        | Cold Storage   | Cold Storage + IMZ |
| <b>Sugars</b>             |                |                |                    |                |                |                    |
| <b>Fructose</b>           | 294.33 ± 13.24 | 300.78 ± 7.62  | 276.04 ± 16.61     | 244.63 ± 46.93 | 248.29 ± 40.44 | 227.36 ± 26.46     |
| <b>Glucose</b>            | 271.42 ± 8.71  | 260.57 ± 17.82 | 248.01 ± 4.48      | 213.44 ± 40.30 | 219.39 ± 38.42 | 207.42 ± 29.98     |
| <b>Sucrose</b>            | 387.03 ± 15.36 | 385.59 ± 29.26 | 389.41 ± 16.22     | 211.18 ± 19.47 | 208.90 ± 18.21 | 222.87 ± 9.29      |
| <b>myo-Inositol</b>       | 98.75 ± 9.64   | 99.48 ± 7.95   | 97.46 ± 10.73      | 88.83 ± 7.43   | 79.86 ± 22.06  | 89.10 ± 10.62      |
| <b>Amino Acids</b>        |                |                |                    |                |                |                    |
| <b>Alanine</b>            | 0.94 ± 0.06    | 0.92 ± 0.05    | 1.04 ± 0.32        | 1.21 ± 0.20    | 1.10 ± 0.20    | 1.42 ± 0.43        |
| <b>Arginine</b>           | 45.04 ± 0.98   | 53.97 ± 1.84   | 54.19 ± 1.18       | 58.34 ± 2.12   | 63.78 ± 1.54   | 73.60 ± 2.33       |
| <b>Asparagine</b>         | ND             | ND             | ND                 | ND             | ND             | ND                 |
| <b>Aspartate</b>          | 32.98 ± 2.58   | 32.76 ± 1.75   | 36.15 ± 4.38       | 27.85 ± 4.60   | 26.31 ± 2.60   | 25.60 ± 3.49       |
| <b>Isoleucine</b>         | 0.14 ± 0.02    | 0.12 ± 0.03    | 0.13 ± 0.02        | 0.15 ± 0.03    | 0.15 ± 0.01    | 0.19 ± 0.04        |
| <b>Leucine</b>            | 0.26 ± 0.07    | 0.24 ± 0.06    | 0.26 ± 0.03        | 0.23 ± 0.03    | 0.22 ± 0.02    | 0.28 ± 0.04        |
| <b>Phenylalanine</b>      | 0.11 ± 0.02    | 0.13 ± 0.02    | 0.14 ± 0.01        | 0.20 ± 0.06    | 0.20 ± 0.05    | 0.20 ± 0.03        |
| <b>Proline</b>            | 7.21 ± 1.33    | 7.50 ± 0.74    | 7.38 ± 2.45        | 5.77 ± 1.89    | 8.70 ± 1.76    | 10.71 ± 3.15       |
| <b>Threonine</b>          | 0.30 ± 0.03    | 0.27 ± 0.04    | 0.29 ± 0.04        | 0.35 ± 0.06    | 0.37 ± 0.06    | 0.47 ± 0.09        |
| <b>Valine</b>             | 0.30 ± 0.02    | 0.29 ± 0.02    | 0.28 ± 0.04        | 0.29 ± 0.05    | 0.29 ± 0.04    | 0.32 ± 0.07        |
| <b>Organic Acids</b>      |                |                |                    |                |                |                    |
| <b>2-Phosphoglycerate</b> | 63.44 ± 9.57   | 66.24 ± 12.33  | 74.20 ± 3.91       | 67.88 ± 8.20   | 63.33 ± 7.43   | 67.48 ± 10.87      |
| <b>4-Aminobutyrate</b>    | ND             | ND             | ND                 | ND             | ND             | ND                 |
| <b>Citrate</b>            | 107.85 ± 12.79 | 113.96 ± 19.86 | 112.09 ± 13.27     | 90.22 ± 22.61  | 97.85 ± 19.85  | 91.31 ± 9.13       |
| <b>Formate</b>            | 0.03 ± 0.01    | 0.02 ± 0.01    | 0.03 ± 0.01        | 0.05 ± 0.02    | 0.04 ± 0.01    | 0.06 ± 0.02        |
| <b>Malate</b>             | ND             | ND             | ND                 | ND             | ND             | ND                 |
| <b>Malonate</b>           | 0.93 ± 0.11    | 0.96 ± 0.13    | 0.91 ± 0.33        | 0.44 ± 0.21    | 0.75 ± 0.14    | 1.23 ± 0.69        |
| <b>Succinate</b>          | 0.10 ± 0.01    | 0.12 ± 0.01    | 0.12 ± 0.04        | 0.12 ± 0.04    | 0.18 ± 0.03    | 0.29 ± 0.12        |
| <b>Others</b>             |                |                |                    |                |                |                    |
| <b>Adenosine</b>          | 0.20 ± 0.03    | 0.18 ± 0.03    | 0.23 ± 0.03        | 0.24 ± 0.10    | 0.34 ± 0.05    | 0.42 ± 0.04        |
| <b>Choline</b>            | 0.56 ± 0.05    | 0.62 ± 0.08    | 0.53 ± 0.13        | 0.26 ± 0.06    | 0.38 ± 0.09    | 0.49 ± 0.13        |
| <b>Proline betaine</b>    | 3.33 ± 0.38    | 3.40 ± 0.16    | 3.37 ± 0.54        | 3.86 ± 0.96    | 4.26 ± 1.42    | 5.12 ± 1.28        |
| <b>Synephrine</b>         | 0.77 ± 0.08    | 0.77 ± 0.09    | 0.66 ± 0.10        | 0.84 ± 0.18    | 0.88 ± 0.12    | 0.91 ± 0.06        |
| <b>Trigonelline</b>       | 0.08 ± 0.02    | 0.07 ± 0.00    | 0.08 ± 0.01        | 0.04 ± 0.01    | 0.04 ± 0.02    | 0.05 ± 0.01        |

*Expressed in mM with ± Standard Deviation, ND: Not Detected*

Table S4a: Metabolite Fold Change and p-values of Clementine Control Fruit vs. Cold Storage Fruit

| #  | metabolites          | Navel         |               |               | Clementine    |               |               |
|----|----------------------|---------------|---------------|---------------|---------------|---------------|---------------|
|    |                      | Albedo        | Flavedo       | Juice         | Albedo        | Flavedo       | Juice         |
|    |                      | ctrl vs. 10dC |
|    |                      | FC            | FC            | FC            | FC            | FC            | FC            |
| 1  | 2-Phosphoglycerate   |               |               | (1.07)        |               |               | 1.04          |
| 2  | 4-Aminobutyrate      | 1.00          | (1.29)        |               | 1.03          | 1.06          |               |
| 3  | Acetone              | (1.09)        | (1.28)        | 1.03          | (1.03)        | 1.00          | (1.13)        |
| 4  | <b>Adenosine</b>     | (1.16)        | 1.09          | <b>1.64</b>   | (1.21)        | (1.12)        | (1.08)        |
| 5  | Alanine              | (1.20)        | (1.28)        | (1.10)        | (1.44)        | (1.18)        | (1.02)        |
| 6  | <b>Arginine</b>      | (1.21)        | 1.09          | 1.10          | <b>(1.63)</b> | (1.03)        | 1.19          |
| 7  | <b>Asparagine</b>    |               | 1.04          |               |               | <b>(1.48)</b> |               |
| 8  | Aspartate            |               |               | (1.05)        |               |               | (1.01)        |
| 9  | <b>Choline</b>       | <b>1.77</b>   | 1.21          | <b>1.48</b>   | (1.17)        | 1.15          | 1.11          |
| 10 | <b>Citrate</b>       | <b>(1.96)</b> | 1.01          | 1.09          | 1.00          | <b>(1.50)</b> | 1.05          |
| 11 | <b>Formate</b>       | 1.02          | (1.37)        | (1.44)        | <b>(1.68)</b> | 1.25          | (1.32)        |
| 12 | Fructose             | 1.01          | 1.07          | 1.02          | (1.38)        | 1.09          | 1.02          |
| 13 | Glucose              | 1.09          | 1.09          | 1.03          | (1.35)        | 1.18          | (1.04)        |
| 14 | <b>Isoleucine</b>    | 1.52          | 1.23          | 1.03          | <b>(1.93)</b> | 1.19          | (1.14)        |
| 15 | <b>Leucine</b>       | <b>(1.53)</b> | <b>(1.77)</b> | (1.02)        | (1.09)        | (1.08)        | (1.04)        |
| 16 | <b>Malate</b>        | <b>(2.36)</b> | (1.01)        |               | 1.05          | 1.18          |               |
| 17 | <b>Malonate</b>      | 1.35          | 1.08          | <b>1.84</b>   | (1.18)        | (1.09)        | 1.03          |
| 18 | <b>Phenylalanine</b> | 1.04          | 1.05          | 1.01          | <b>(1.58)</b> | (1.03)        | 1.21          |
| 19 | <b>Proline</b>       | (1.21)        | (1.07)        | <b>1.54</b>   | (1.11)        | (1.29)        | 1.05          |
| 20 | Proline betaine      | 1.27          | (1.35)        | 1.09          | (1.02)        | 1.03          | 1.02          |
| 21 | Succinate            | (1.42)        | 1.54          | 1.53          | (1.40)        | 1.11          | 1.14          |
| 22 | Sucrose              | (1.39)        | <b>(1.54)</b> | (1.01)        | <b>(1.66)</b> | (1.40)        | (1.01)        |
| 23 | <b>Synephrine</b>    | (1.12)        | (1.01)        | 1.06          | <b>(1.50)</b> | (1.05)        | 1.00          |
| 24 | <b>Threonine</b>     | 1.09          | 1.03          | 1.04          | <b>(1.48)</b> | (1.05)        | (1.11)        |
| 25 | <b>Trigonelline</b>  |               |               | 1.08          | <b>(1.57)</b> | 1.13          | (1.09)        |
| 26 | <b>Valine</b>        | 1.11          | 1.07          | 1.00          | <b>(1.62)</b> | 1.06          | (1.03)        |
| 27 | myo-Inositol         | 1.10          | 1.03          | (1.15)        | (1.26)        | 1.10          | 1.01          |

Significant metabolites are shown in block letters and underlined. Numbers in red and parenthesis represent down-regulated metabolites

Table S4b: Metabolite Fold Change and p-values of Clementine Cold Storage vs. Cold Storage + Treatment

| #  | metabolites        | Navel         |               |               | Clementine    |               |               |
|----|--------------------|---------------|---------------|---------------|---------------|---------------|---------------|
|    |                    | Albedo        | Flavado       | Juice         | Albedo        | Flavado       | Juice         |
|    |                    | 0dC vs. 10dCM |
|    |                    | FC            | FC            | FC            | FC            | FC            | FC            |
| 1  | 2-Phosphoglycerate |               |               | 1.06          |               |               | 1.13          |
| 2  | 4-Aminobutyrate    | 1.07          | 1.05          |               | 1.02          | (1.16)        |               |
| 3  | Acetone            | (1.08)        | (1.27)        | (1.02)        | (1.11)        | (1.17)        | 1.10          |
| 4  | Adenosine          | (1.05)        | (1.00)        | 1.24          | 1.36          | 1.33          | 1.28          |
| 5  | <b>Alanine</b>     | (1.03)        | (1.02)        | 1.26          | <b>1.66</b>   | 1.19          | 1.09          |
| 6  | Arginine           | (1.07)        | 1.04          | 1.15          | (1.03)        | 1.44          | 1.01          |
| 7  | Asparagine         |               | 1.48          |               |               | (1.42)        |               |
| 8  | Aspartate          |               |               | (1.03)        |               |               | 1.10          |
| 9  | Choline            | 1.02          | 1.19          | 1.27          | 1.23          | (1.04)        | (1.20)        |
| 10 | Citrate            | 1.34          | 1.35          | (1.06)        | (1.51)        | (1.39)        | (1.01)        |
| 11 | Formate            |               | 1.38          | 1.37          | 1.06          | 1.09          | 1.24          |
| 12 | Fructose           | (1.00)        | 1.07          | (1.09)        | 1.24          | 1.02          | (1.09)        |
| 13 | Glucose            | (1.01)        | 1.07          | (1.05)        | 1.22          | (1.04)        | (1.05)        |
| 14 | Isoleucine         | 1.10          | (1.11)        | 1.21          | 1.05          | 1.08          | 1.12          |
| 15 | Leucine            | (1.09)        | 1.08          | 1.27          | 1.39          | 1.24          | 1.09          |
| 16 | Malate             | 1.81          | 1.66          |               | (1.11)        | (1.10)        |               |
| 17 | Malonate           | 1.25          | 1.32          | 1.49          | 1.11          | (1.11)        | (1.10)        |
| 18 | Phenylalanine      | (1.24)        | (1.09)        | 1.04          | 1.38          | (1.08)        | 1.08          |
| 19 | Proline            | 1.08          | 1.25          | 1.21          | (1.02)        | (1.19)        | (1.06)        |
| 20 | Proline betaine    | (1.02)        | 1.38          | 1.22          | 1.03          | (1.35)        | (1.02)        |
| 21 | <b>Succinate</b>   | 1.30          | <b>1.78</b>   | <b>1.57</b>   | 1.09          | (1.30)        | (1.05)        |
| 22 | Sucrose            | (1.11)        | (1.15)        | 1.07          | 1.17          | 1.04          | 1.01          |
| 23 | Synephrine         | (1.17)        | (1.05)        | 1.04          | 1.38          | (1.06)        | (1.18)        |
| 24 | Threonine          | (1.15)        | 1.00          | 1.29          | 1.29          | 1.00          | 1.08          |
| 25 | Trigonelline       |               |               | 1.12          | 1.26          | 1.02          | 1.10          |
| 26 | <b>Valine</b>      | 1.10          | (1.01)        | 1.07          | <b>1.79</b>   | 1.15          | (1.03)        |
| 27 | myo-Inositol       | (1.07)        | 1.04          | 1.16          | 1.44          | 1.12          | (1.02)        |

Significant metabolites are shown in block letters and underlined. Numbers in red and parenthesis represent down-regulated metabolites
